# Supplementary material for: Unsymmetric vesicles with a different design on each side for near-infrared fluorescence imaging of tumor tissues
Source: Royal Society of Chemistry journal article supplement (doi:10.1039/c4ra15635h), 2015-01-01
Supplement: c4ra15635h1.pdf [file c4ra15635h1.pdf]

## Electronic Supplementary Information

### Unsymmetric Vesicles with a Different Design on Each Side for Near-Infrared Fluorescence Imaging of Tumor Tissues

Akihiro Uesaka,<sup>a</sup> Isao Hara,<sup>b</sup> Tomoya Imai,<sup>c</sup> Junji Sugiyama,<sup>c</sup> and Shunsaku Kimura<sup>\*a</sup>

<sup>a</sup> *Department of Material Chemistry, Graduate School of Engineering, Kyoto University, Kyoto-Daigaku-Katsura, Nishikyo-ku, Kyoto, 615-8510, Japan.*

<sup>b</sup> *Technology Research Laboratory, Shimadzu Corporation, 3-9-4 Hikari-dai, Seika-cho, Soraku-gun, Kyoto 619-0237, Japan.*

<sup>c</sup> *Research Institute for Sustainable Humanosphere (RISH), Kyoto University, Gokasho, Uji, Kyoto 611-0011, Japan.*

## CONTENTS

1. Synthesis of amphiphilic peptides
2. wide-area TEM images of vesicles containing lipoic acid
3. TEM images of vesicles attached AuNPs
4. The hydrodynamic diameters of vesicles
5. Histogram of the diameters of ICGABL vesicle and ICGABD vesicle

## 1. Synthesis of amphiphilic peptides

The synthesis route of the amphiphilic peptides modified with ICG, **ICGABL** and **ICGABD** were illustrated in Scheme 1. Other amphiphilic peptides, **A<sub>3</sub>BL**, **ABD**, **lipoABL** and **lipoABD** were synthesized as previously reported.

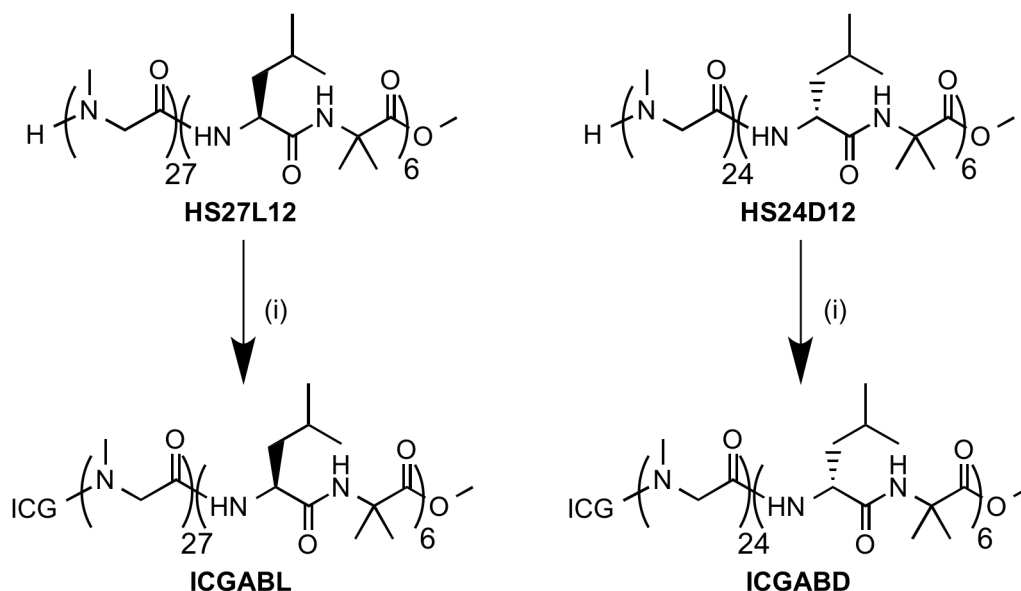

**Scheme 1.** Reagents and conditions: (i) ICG-sulfo-OSu, DCC, DMF, rt, 24 h.

### ICGABL

To a solution of **HS27L12** (2.0 mg, 637 nmol) in DMF (100  $\mu$ L), a solution of ICG-sulfo-OSu (1.0 mg, 1.08  $\mu$ mol) and DCC (444  $\mu$ g, 2.15  $\mu$ mol) in DMF (120  $\mu$ L) was added at 0  $^{\circ}$ C. The reaction mixture was stirred at 0  $^{\circ}$ C for 0.5 h and then at room temperature for 23 h. The solution was concentrated under reduced pressure and the crude product was purified with Sephadex LH20 column (eluent : methanol). The product was obtained as a green solid (2.4 mg, 98%).

MALDI-TOF mass spectrum supported the degree of polymerization to be 27.

MALDI-TOF-MS (matrix:  $\alpha$ -cyano-4-hydroxycinnamic acid (CHCA)): calcd. for  $C_{187}H_{295}N_{41}O_{44}S$  [(M + H)<sup>+</sup>], 3852.190; found, 3852.192.

### ICGABD

To a solution of **HS24D12** (2.0 mg, 683 nmol) in DMF (100  $\mu$ L), a solution of ICG-sulfo-OSu (1.0 mg, 1.08  $\mu$ mol) and DCC (444  $\mu$ g, 2.15  $\mu$ mol) in DMF (120  $\mu$ L) was added at 0  $^{\circ}$ C. The reaction mixture was stirred at 0  $^{\circ}$ C for 0.5 h and then at room temperature for 23 h. The solution was concentrated under reduced pressure and the crude

product was purified with Sephadex LH20 column (eluent : methanol). The product was obtained as a green solid (2.2 mg, 88%).

MALDI-TOF mass spectrum supported the degree of polymerization to be 24.

MALDI-TOF-MS (matrix: CHCA): calcd. for  $C_{178}H_{280}N_{38}O_{41}S$   $[(M + H)^+]$ , 3677.035; found, 3677.018.

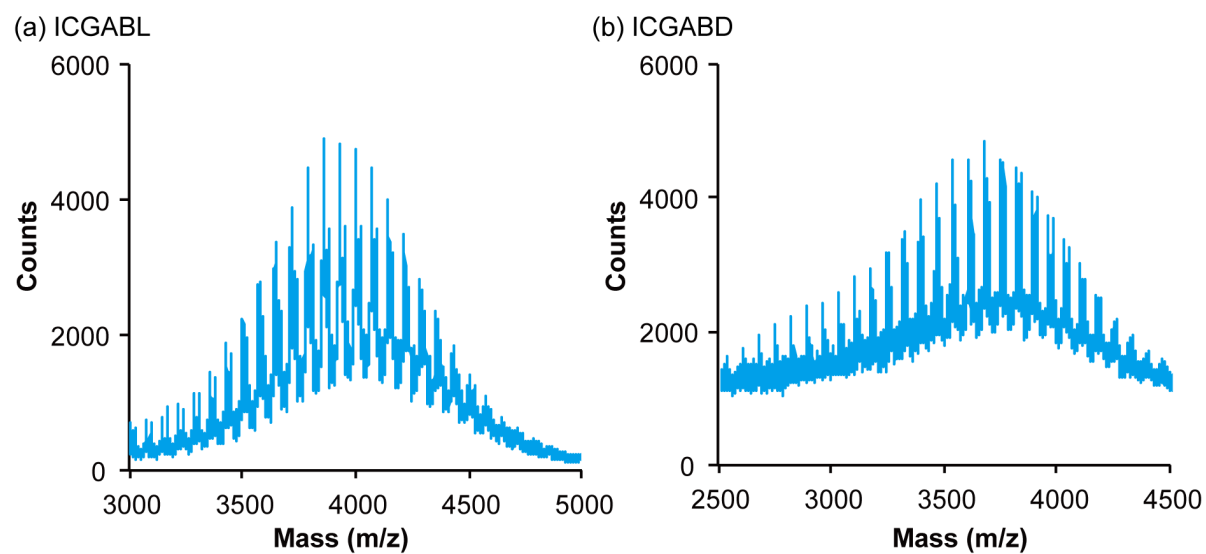

**Fig. S1** MALDI-TOF mass data of (a) **ICGABL** and (b) **ICGABD**.

## 2. wide-area TEM images of vesicles containing lipoic acid

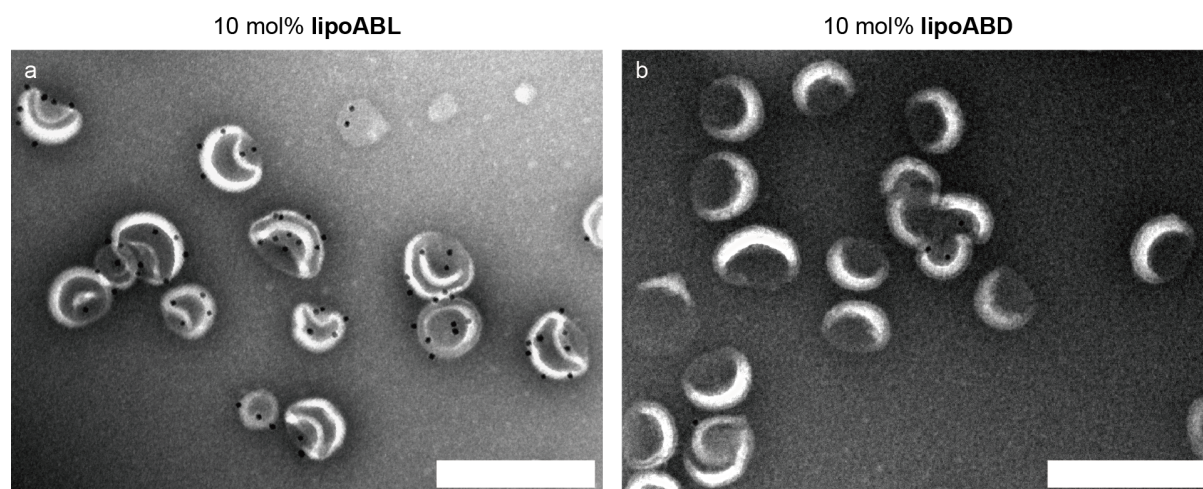

**Fig. S2** TEM images (negative stained with 2% uranyl acetate) of vesicles prepared from (a) **A<sub>3</sub>BL + ABD + lipoABL** (0.4/0.5/0.1) and (b) **A<sub>3</sub>BL + ABD + lipoABD** (0.5/0.4/0.1) in milliQ upon a heat treatment at 90 °C for 1 h. An aliquot of a 10 nm AuNP suspension was added to the vesicles on the TEM grid. Bars indicate 200 nm.

### 3. TEM images of vesicles attached AuNPs

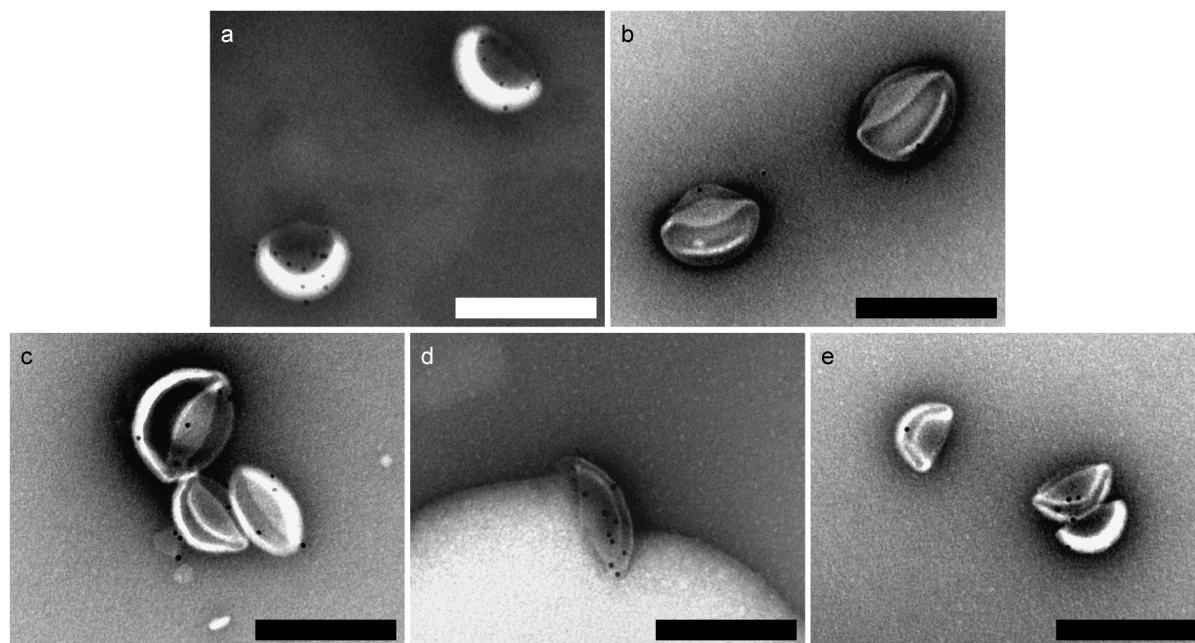

**Fig. S3** TEM images (negative stained with 2% uranyl acetate) of vesicles prepared from (a) **A<sub>3</sub>BL + ABL + ABD + lipoABL** (0.3/0.1/0.5/0.1), (b) **A<sub>3</sub>BL + ABL + ABD + lipoABD** (0.3/0.2/0.4/0.1), (c) **A<sub>3</sub>BL + ABL + ABD + lipoABL** (0.25/0.15/0.5/0.1), (d) **A<sub>3</sub>BL + ABL + ABD + lipoABD** (0.25/0.25/0.4/0.1) and (e) **A<sub>3</sub>BL + ABL + ABD** (0.3/0.2/0.5) in milliQ upon a heat treatment at 90 °C for 1 h. An aliquot of a 10 nm AuNP suspension was added to the vesicles on the TEM grid. Bars indicate 200 nm.

#### 4. The hydrodynamic diameters of vesicles

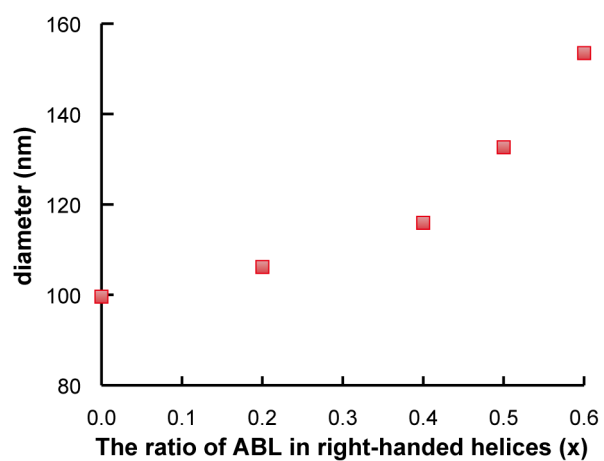

**Fig. S4** The hydrodynamic diameter of vesicles at each proportion of **ABL** in constituent right-handed helices.  $A_3BL/ABL/ABD = 1-x/x/1$  (mol/mol/mol).

## 5. Histogram of the diameters of ICGABL vesicle and ICGABD vesicle

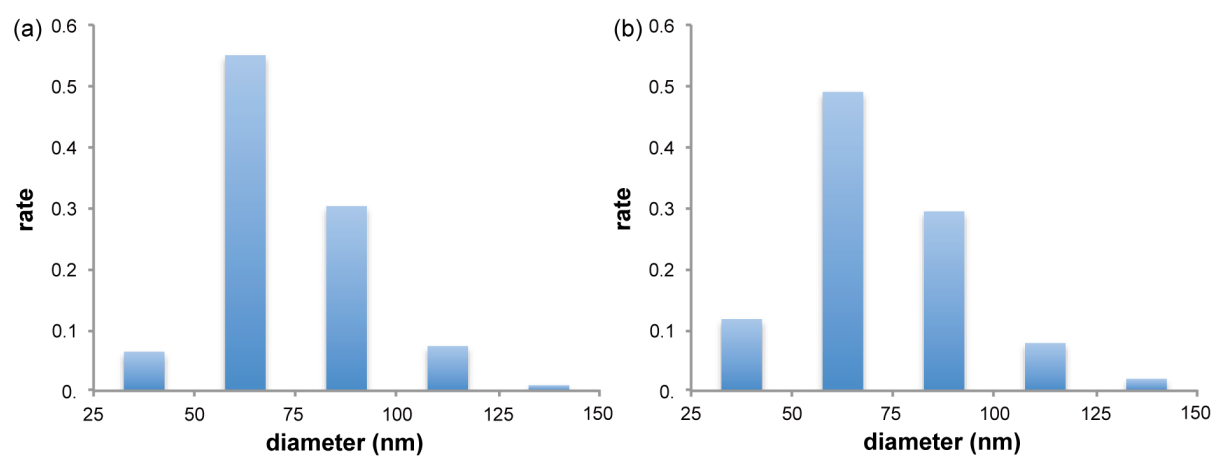

**Fig. S5** Histograms of the diameter of the vesicles containing (a) **ICGABL** and (b) **ICGABD** observed by Cryo-TEM.
